# Supplementary material for: Terthiophene–C60 dyads as donor/acceptor compatibilizers for developing highly stable P3HT/PCBM bulk heterojunction solar cells
Source: Royal Society of Chemistry journal article supplement (doi:10.1039/c5ta02953h), 2015-01-01
Supplement: c5ta02953h1.pdf [file c5ta02953h1.pdf]

## Terthiophene-C<sub>60</sub> dyad as donor/acceptor compatibilizer for developing highly stable P3HT/PCBM bulk heterojunction solar cells

Rathinam Raja<sup>a,\*</sup>, Wei-Shin Liu<sup>b</sup>, Chuen-Yo Hsiow<sup>c</sup>, Syang-Peng Rwei<sup>d</sup>, Wen-Yen Chiu<sup>b,c</sup>, Leeyih Wang<sup>a,c,\*</sup>

<sup>a</sup>Center for Condensed Matter Sciences, National Taiwan University, Taipei, 10617, Taiwan

<sup>b</sup>Department of Chemical Engineering, National Taiwan University, Taipei, 10617, Taiwan

<sup>c</sup>Institute of Polymer Science and Engineering, National Taiwan University, Taipei, 10617, Taiwan

<sup>d</sup>Institute of Organic and Polymeric Materials, National Taipei University of Technology, Taipei, 10608, Taiwan

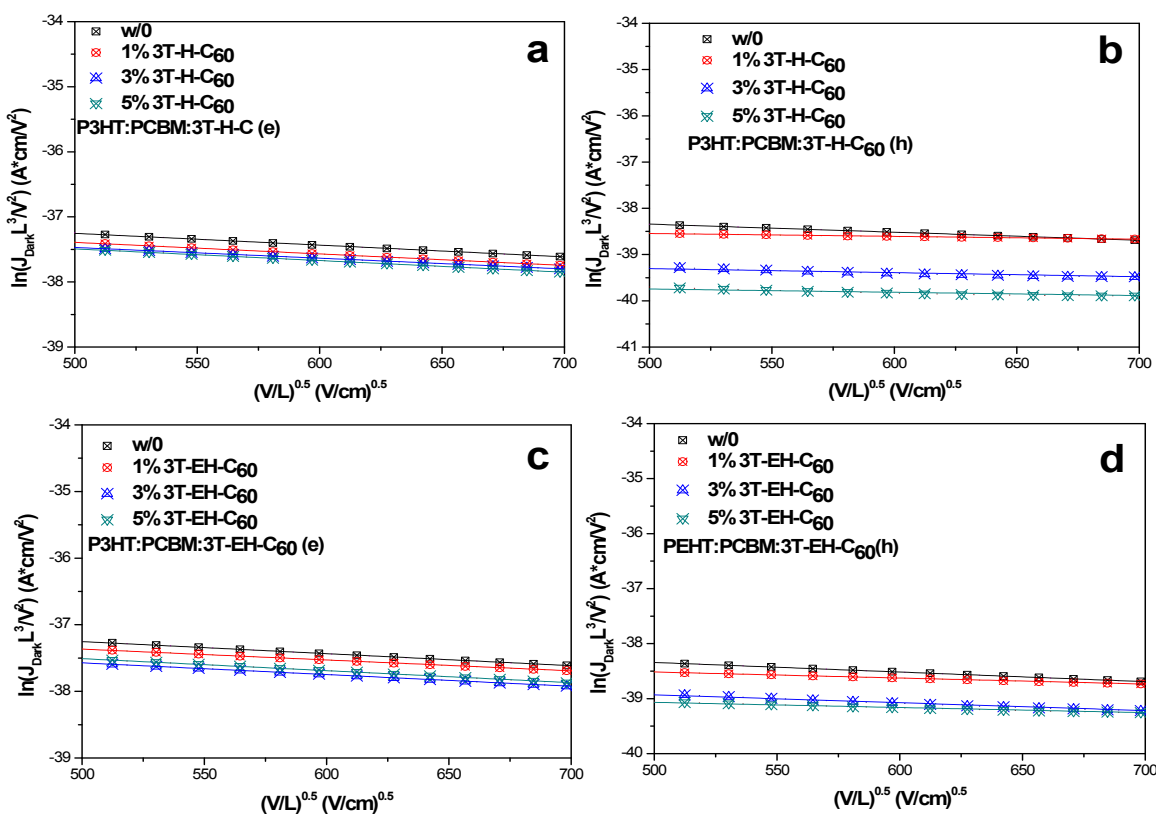

**Figure S1**  $J$ - $V$  characteristics of electron-only (a & c) and hole-only (b & d) devices fabricated from P3HT/PCBM blends, in which various weight ratios of PCBM is replaced with 3T-H-C<sub>60</sub> or 3T-EH-C<sub>60</sub>.

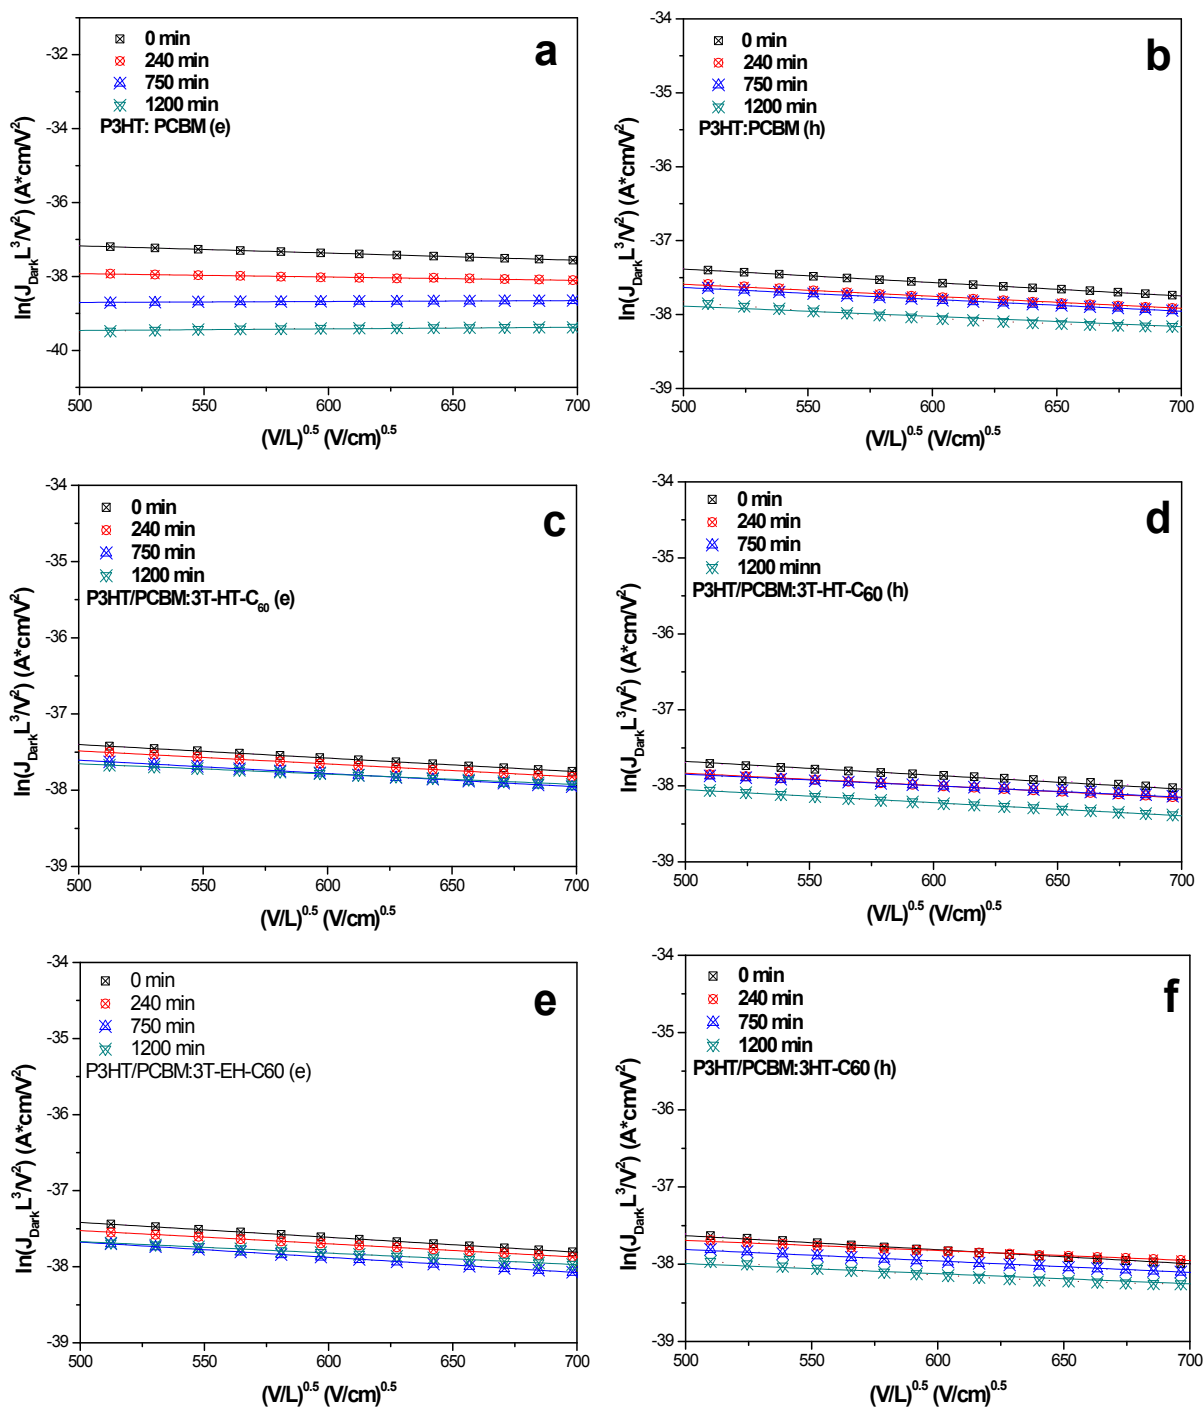

**Figure S2**  $J$ - $V$  characteristics of electron-only (a, c & e) and hole-only (b, d & f) devices fabricated from P3HT/PCBM, P3HT/PCBM:3T-H-C<sub>60</sub> (1 wt%) and P3HT/PCBM:3T-EH-C<sub>60</sub> (3 wt%) blends, which were annealed at 130 °C for different periods.
